# Supplementary figures and images for: Microtubule-binding domains in Katanin p80 subunit are essential for severing activity in C. elegans
Source: PubMed Central journal article supplement — J Cell Biol. 2024 Feb 8;223(4):e202308023. doi: 10.1083/jcb.202308023 (PMC10853069; doi:10.1083/jcb.202308023), 2024-02-08

**B**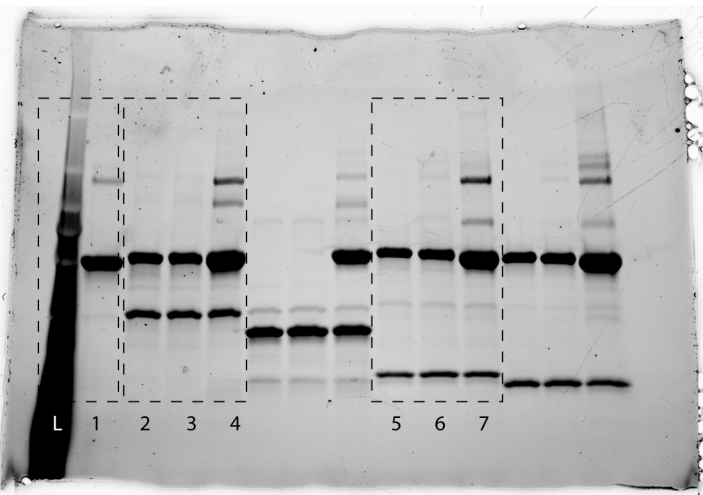**C**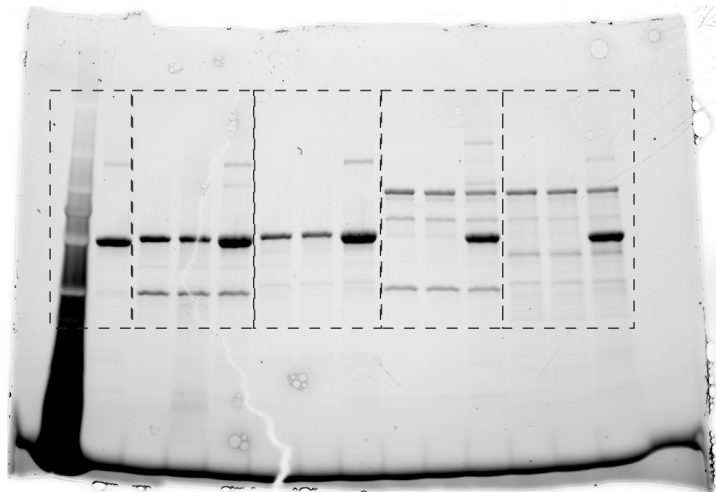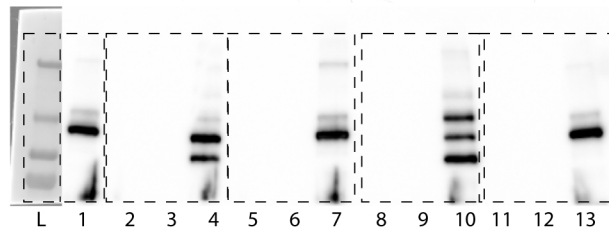

Supplement: JCB_202308023_SourceDataF1.pdf [file JCB_202308023_SourceDataF1.pdf]

**B**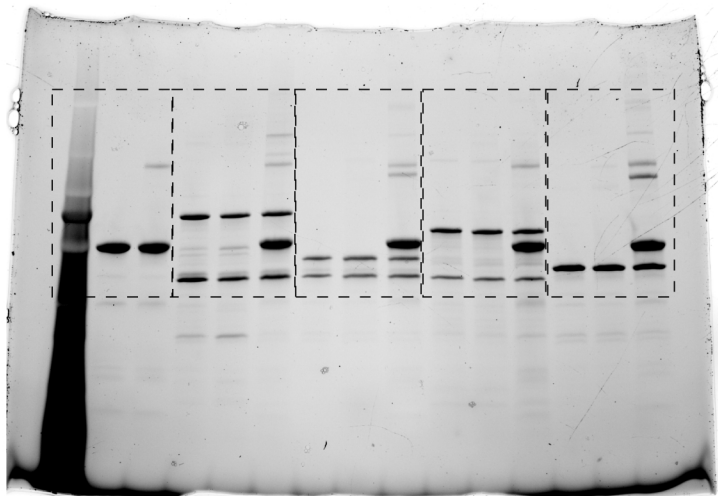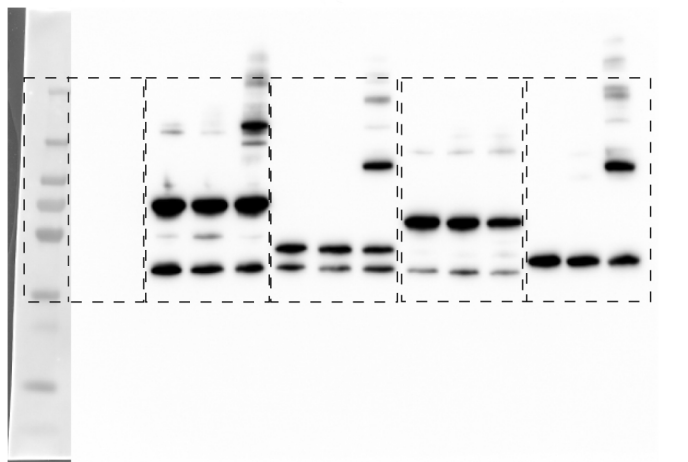

L 1 2 3 4 5 6 7 8 9 10 11 12 13 14

**C**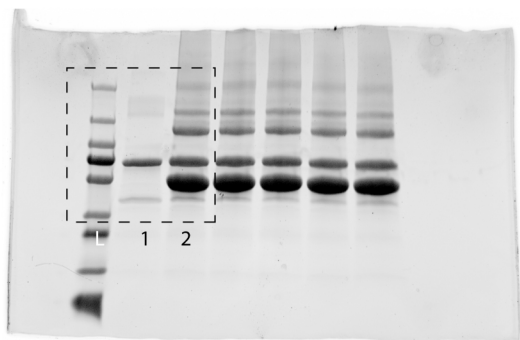

Supplement: JCB_202308023_SourceDataF2.pdf [file JCB_202308023_SourceDataF2.pdf]

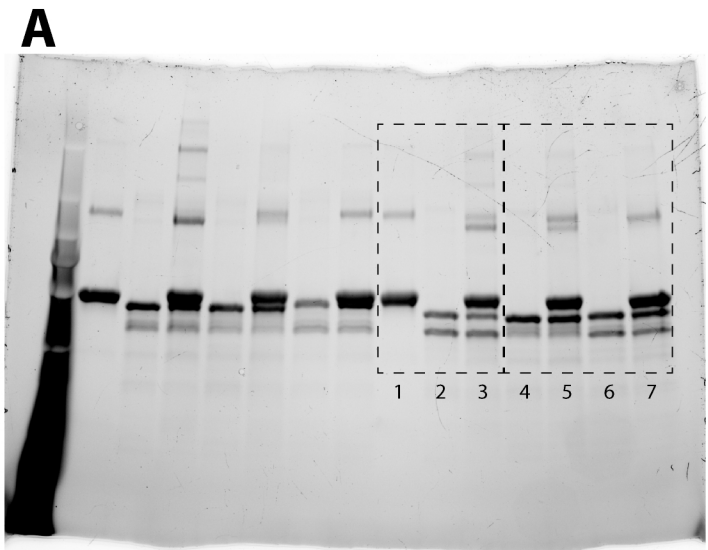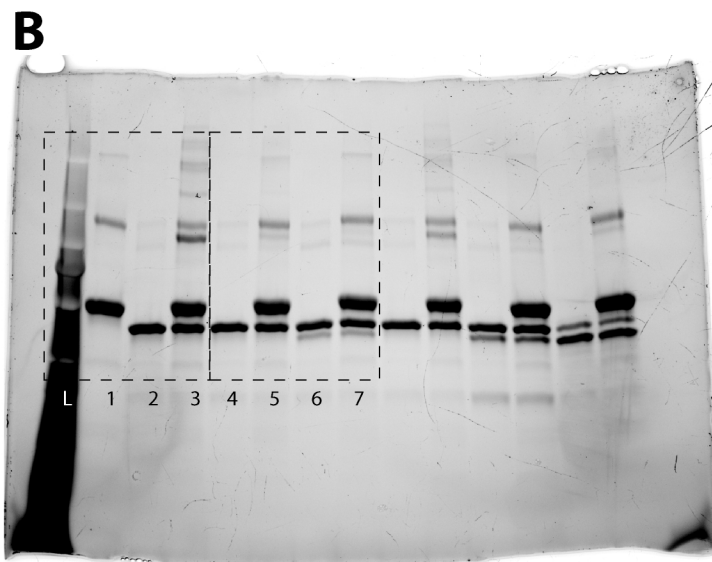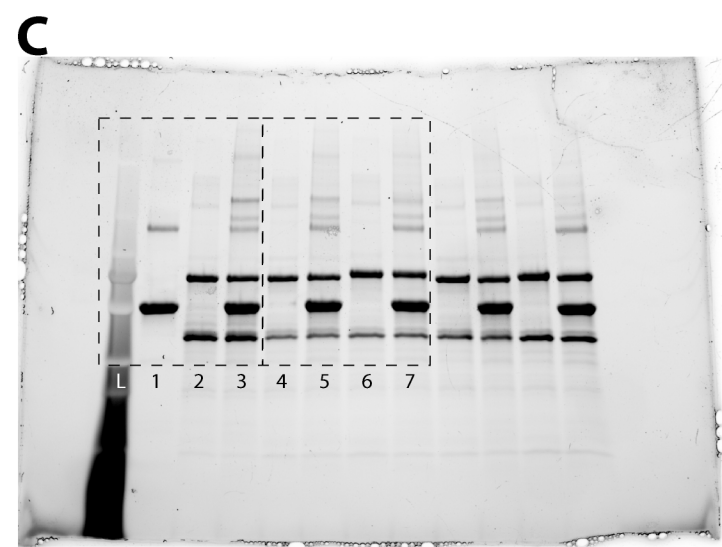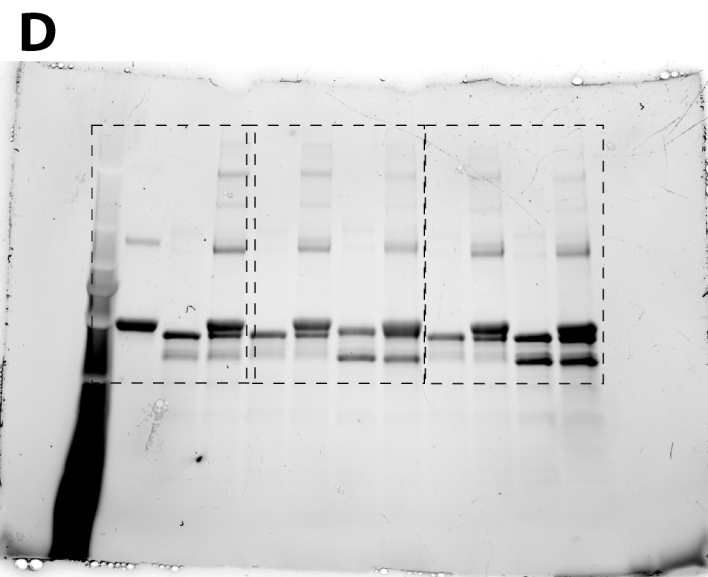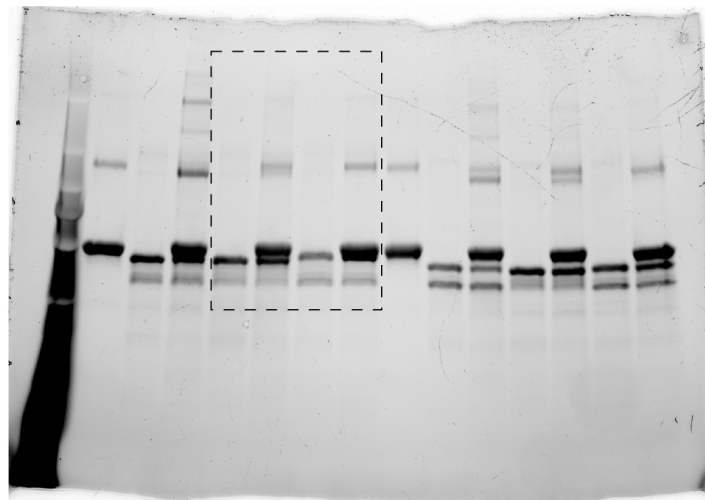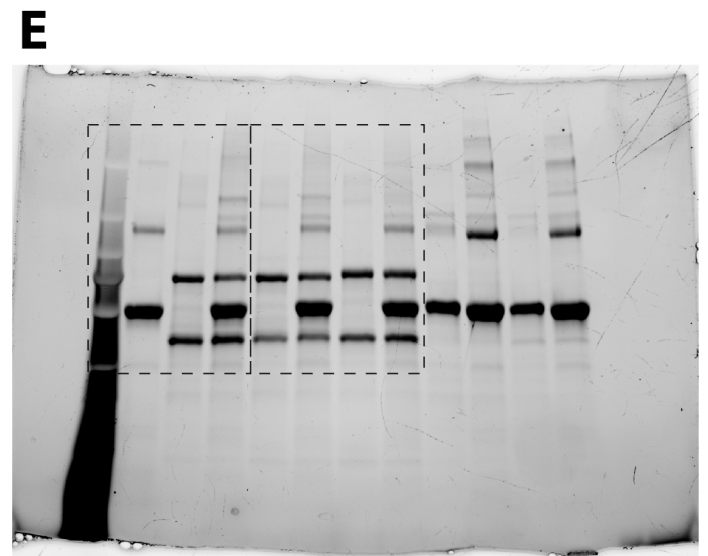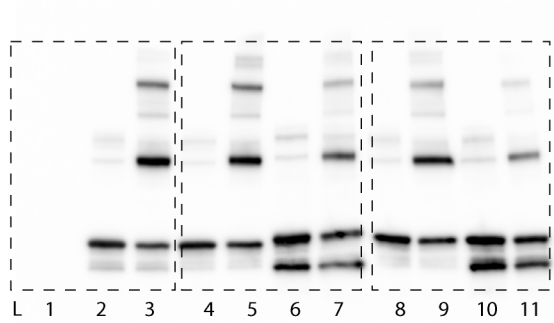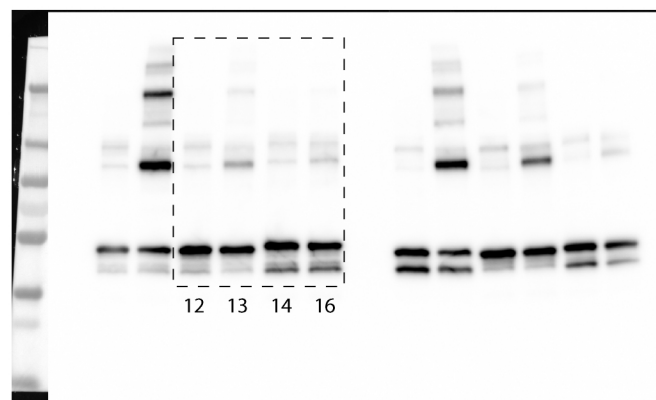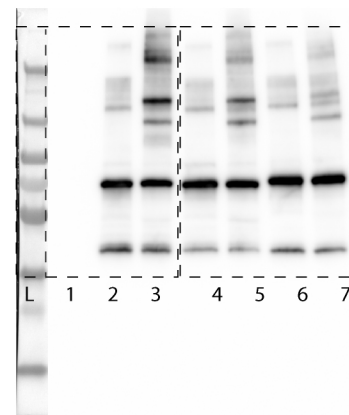

Supplement: JCB_202308023_SourceDataF3.pdf [file JCB_202308023_SourceDataF3.pdf]

**A**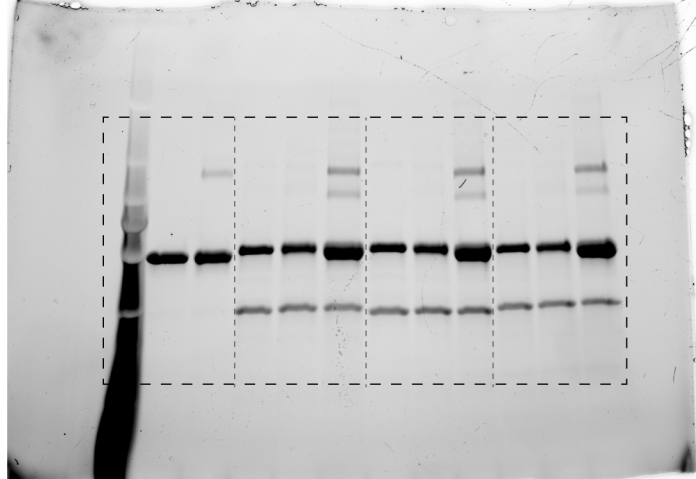**B**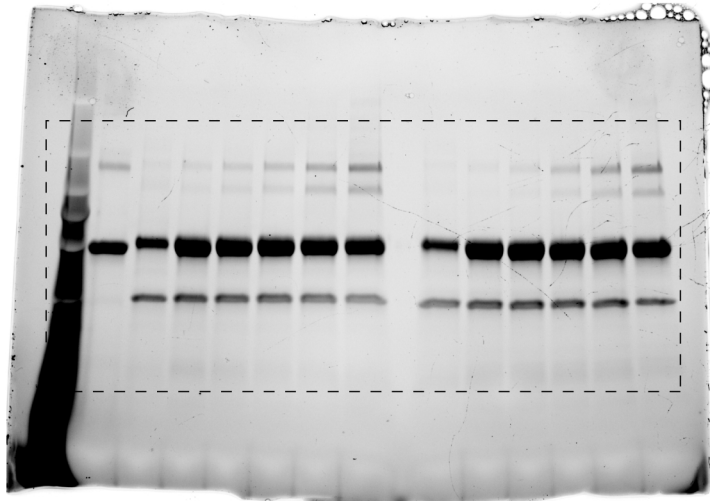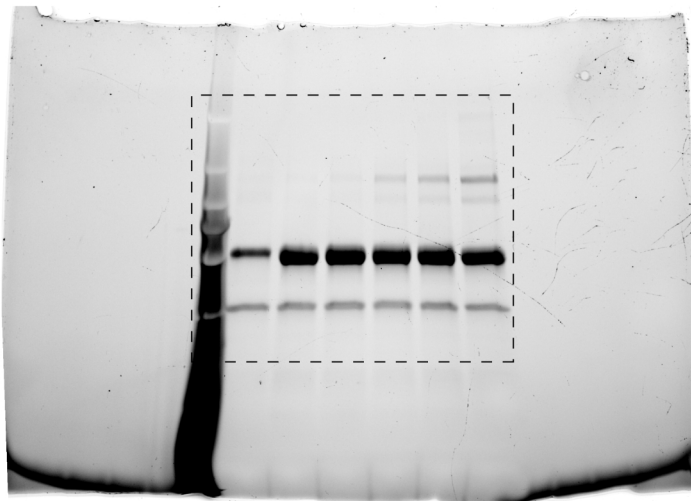

Supplement: JCB_202308023_SourceDataFS1.pdf [file JCB_202308023_SourceDataFS1.pdf]
